# Supplementary material for: Validity and Reliability of a Short Diet Questionnaire to Estimate Dietary Intake in Older Adults in a Subsample of the Canadian Longitudinal Study on Aging
Source: PubMed Central journal article supplement (PMC6213467; doi:10.3390/nu10101522), 2018-10-17
Supplement: nutrients-10-01522-s001.pdf [file nutrients-10-01522-s001.pdf]

**Supplementary Table S1: Estimated intake of individual line items from SDQ1 and SQ2 and test-retest reliability between administrations, CLSA Diet Study ( $n = 232$ ).**

| SDQ Line Item                                           | SDQ1 |      | SDQ2 |      | ICC (95%) CI      |
|---------------------------------------------------------|------|------|------|------|-------------------|
|                                                         | Mean | SD   | Mean | SD   |                   |
| High fiber breakfast cereals                            | 0.45 | 0.41 | 0.49 | 0.43 | 0.70 (0.62–0.91)  |
| Whole wheat breads, bran breads, multigrain breads      | 0.80 | 0.68 | 0.73 | 0.53 | 0.40 (0.29–0.89)  |
| Beef, pork (ground, hamburgers, roast beef, steak)      | 0.28 | 0.26 | 0.28 | 0.22 | 0.45 (0.34–0.87)  |
| Other meats (veal, lamb, game)                          | 0.03 | 0.05 | 0.03 | 0.06 | 0.54 (0.44–0.89)  |
| Chicken, turkey                                         | 0.32 | 0.19 | 0.32 | 0.19 | 0.70 (0.63–0.78)  |
| Salmon, trout, sardines, herring, tuna, mackerel        | 0.19 | 0.17 | 0.18 | 0.17 | 0.62 (0.54–0.84)  |
| Sausages, hot dogs, ham, smoked meat, bacon             | 0.14 | 0.17 | 0.13 | 0.13 | 0.51 (0.41–0.87)  |
| Patés, cretons, terrines...                             | 0.03 | 0.26 | 0.01 | 0.03 | 0.01 (-0.12–0.87) |
| Sauces and gravies (brown, white, BBQ)                  | 0.10 | 0.13 | 0.13 | 0.16 | 0.40 (0.28–0.79)  |
| Omega-3eggs                                             | 0.12 | 0.21 | 0.13 | 0.23 | 0.69 (0.62–0.90)  |
| All egg dishes except omega 3 eggs (eggs, omelette)     | 0.21 | 0.22 | 0.20 | 0.21 | 0.70 (0.63–0.88)  |
| Legumes (beans, peas, lentils)                          | 0.33 | 0.26 | 0.33 | 0.28 | 0.46 (0.35–0.81)  |
| Nuts, seeds and peanut butter                           | 0.60 | 0.48 | 0.60 | 0.46 | 0.54 (0.44–0.84)  |
| Fruit (fresh, frozen, canned)                           | 1.46 | 0.98 | 1.36 | 0.95 | 0.56 (0.46–0.85)  |
| Green salad                                             | 0.57 | 0.38 | 0.57 | 0.34 | 0.48 (0.37–0.88)  |
| Potatoes (boiled, mashed or baked)                      | 0.30 | 0.22 | 0.30 | 0.25 | 0.64 (0.56–0.93)  |
| French fries or pan-fried potatoes, poutine             | 0.07 | 0.08 | 0.07 | 0.07 | 0.29 (0.17–0.83)  |
| Carrots (fresh, frozen, canned)                         | 0.36 | 0.28 | 0.32 | 0.29 | 0.69 (0.62–0.91)  |
| Other vegetables (except carrots, potatoes or salad)    | 0.98 | 0.87 | 0.92 | 0.69 | 0.32 (0.20–0.85)  |
| All low-fat cheeses                                     | 0.09 | 0.21 | 0.10 | 0.20 | 0.56 (0.46–0.89)  |
| All regular cheeses                                     | 0.43 | 0.32 | 0.41 | 0.32 | 0.60 (0.51–0.90)  |
| Yogurt (low-fat)                                        | 0.35 | 0.43 | 0.31 | 0.40 | 0.62 (0.53–0.85)  |
| Yogurt (regular)                                        | 0.18 | 0.32 | 0.16 | 0.30 | 0.69 (0.62–0.88)  |
| Calcium-fortified foods (soy pudding)                   | 0.01 | 0.10 | 0.02 | 0.12 | 0.56 (0.46–0.85)  |
| Milk-based desserts                                     | 0.12 | 0.17 | 0.15 | 0.19 | 0.66 (0.58–0.85)  |
| Salty snacks (regular chips, crackers)                  | 0.19 | 0.22 | 0.23 | 0.24 | 0.57 (0.47–0.82)  |
| Cakes, pies, doughnuts, pastries, cookies, muffins...   | 0.31 | 0.33 | 0.28 | 0.32 | 0.57 (0.48–0.85)  |
| Chocolate bars                                          | 0.10 | 0.17 | 0.11 | 0.22 | 0.55 (0.46–0.86)  |
| Butter or regular margarine                             | 0.70 | 0.64 | 0.69 | 0.68 | 0.46 (0.35–0.92)  |
| Regular vinaigrettes, salad dressings, mayonnaise, dips | 0.45 | 0.31 | 0.48 | 0.34 | 0.59 (0.50–0.86)  |
| Calcium-fortified juices                                | 0.05 | 0.18 | 0.07 | 0.23 | 0.15 (0.02–0.80)  |
| 100% pure fruit juices (orange, grapefruit or tomato)   | 0.38 | 0.50 | 0.33 | 0.46 | 0.68 (0.60–0.92)  |
| Calcium-fortified milk (35% more calcium)               | 0.00 | 0.00 | 0.05 | 0.27 | 0.00 (-0.13–0.00) |
| Whole milk 3.25% m.f. for drinking                      | 0.02 | 0.15 | 0.04 | 0.21 | 0.21 (0.08–0.90)  |
| 2%, 1%, skim milk for drinking                          | 0.88 | 0.98 | 0.95 | 0.79 | 0.68 (0.60–0.90)  |
| Other calcium-fortified beverages (soy drink)           | 0.08 | 0.31 | 0.08 | 0.33 | 0.46 (0.36–0.86)  |
